# Supplementary material
Source: PubMed Central journal article supplement (PMC3991927)
Supplement: NIHMS569914-supplement-Supplemental_Appendix.pdf [file NIHMS569914-supplement-Supplemental_Appendix.pdf]

## Supplementary Online Content

Loehrer AP, Song Z, Auchincloss HG, Hutter MM. Massachusetts health care reform and reduced racial disparities in minimally invasive surgery. *JAMA Surg*. Published online October 2, 2013. doi:10.1001/jamasurg.2013.2750.

**eFigure 1.** Trend in insurance coverage in Massachusetts

**eFigure 2.** Trends in uninsurance rates in Massachusetts, by patient race

**eFigure 3.** Trends in unemployment between a) Massachusetts and collective control group and b) individual control states

**eTable 1.** Difference-in-differences regression output with corresponding sensitivity analyses for non-white patients (Massachusetts vs control states)

**eTable 2.** Difference-in-differences regression output with corresponding sensitivity analyses for white patients (Massachusetts vs control states)

**eTable 3.** Difference-in-differences regression output with corresponding sensitivity analyses for Massachusetts (non-white vs white patients)

**eTable 4.** Difference-in-differences regression output with corresponding sensitivity analyses for control states (non-white vs white patients)

This supplementary material has been provided by the authors to give readers additional information about their work.

**eFigure 1.** Trend in insurance coverage in Massachusetts

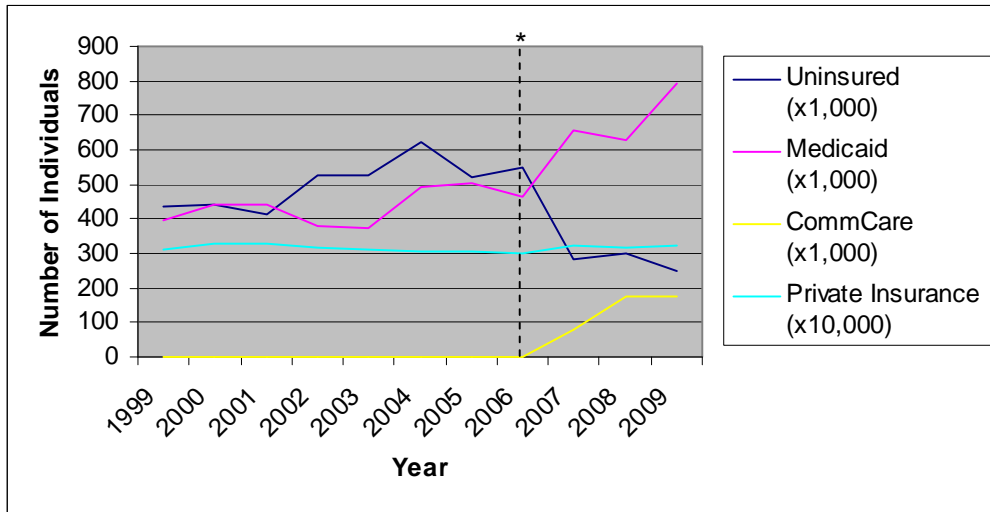

\* 2006 Massachusetts health care reform

**eFigure 2.** Trends in uninsurance rates in Massachusetts, by patient race

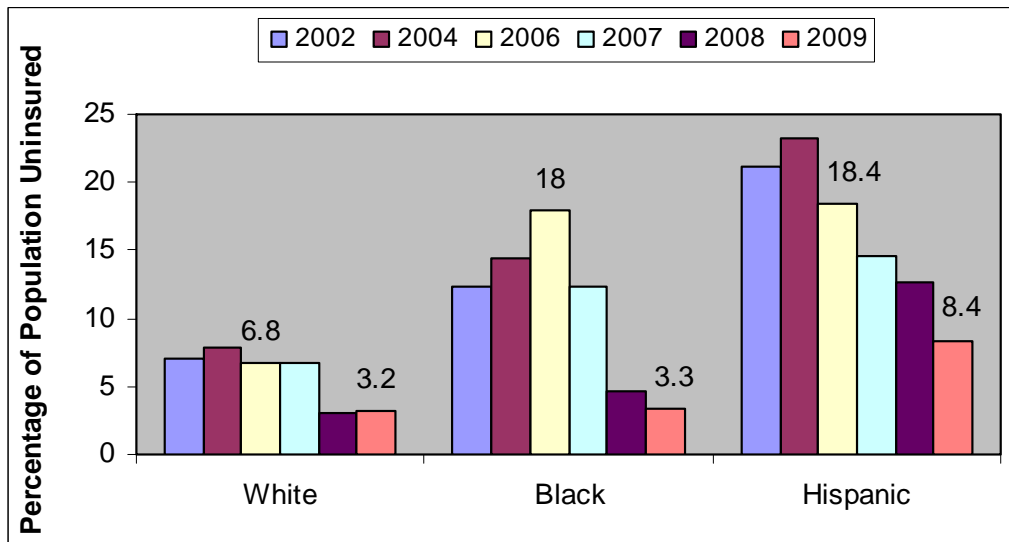

**eFigure 3.** Trends in unemployment between a) Massachusetts and collective control group and b) individual control states

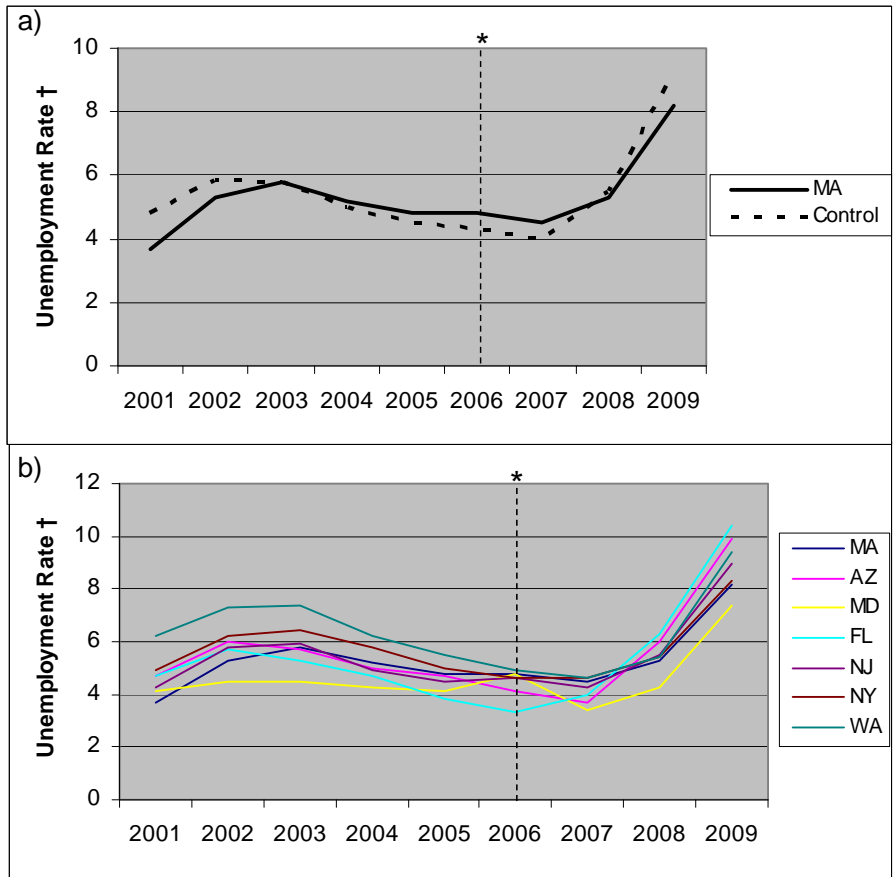

\*2006 Massachusetts Health Care Reform

**eTable 1.** Difference-in-differences regression output with corresponding sensitivity analyses for non-white patients (Massachusetts vs control states)

| Probability of MIS                             | Coefficient | Std Err | P-Value |
|------------------------------------------------|-------------|---------|---------|
| <b>Mass*Intervention</b>                       | 0.0371      | 0.0149  | 0.013   |
| <b>Mass</b>                                    | -0.0026     | 0.0104  | 0.804   |
| <b>Intervention</b>                            | 0.0199      | 0.0089  | 0.025   |
| <b>Age</b>                                     | 0.0005      | 0.0002  | 0.011   |
| <b>Female</b>                                  | 0.2084      | 0.0043  | 0       |
| <b>Elixhauser Comorbidity Index</b>            | 0.0026      | 0.0023  | 0.254   |
| <b>Hospital Type</b>                           |             |         |         |
| Private, <100 beds (Reference)                 | Ref         | Ref     | Ref     |
| Private, >100 beds compared to reference       | 0.3694      | 0.1334  | 0.006   |
| NFP, Rural, <100 compared to reference         | 0.19        | 0.1394  | 0.173   |
| NFP, Rural, >100 beds compared to reference    | 0.1558      | 0.1343  | 0.246   |
| NFP, Urban, <100 beds compared to reference    | 0.3348      | 0.1335  | 0.012   |
| NFP, Urban, 100-299 beds compared to reference | 0.2473      | 0.1321  | 0.061   |
| NFP, Urban, >300 beds compared to reference    | 0.2548      | 0.1321  | 0.054   |
| <b>Admission Type</b>                          |             |         |         |
| Emergent (Reference)                           | Ref         | Ref     | Ref     |
| Urgent compared to reference                   | -0.0094     | 0.0102  | 0.355   |
| Elective compared to reference                 | 0.0323      | 0.0127  | 0.011   |
| <b>Complicated Disease</b>                     | -0.2336     | 0.0097  | 0       |
| <b>Temporal trend (2001 Q1 -- 2009 Q4)</b>     | 0.0099      | 0.0004  | 0       |

**eTable 2.** Difference-in-differences regression output with corresponding sensitivity analyses for White Patients (Massachusetts vs control states)

| Probability of MIS                             | Coefficient | Std Err | P-Value |
|------------------------------------------------|-------------|---------|---------|
| <b>Mass*Intervention</b>                       | -0.0076     | 0.013   | 0.559   |
| <b>Mass</b>                                    | 0.0173      | 0.0089  | 0.051   |
| <b>Intervention</b>                            | 0.0359      | 0.0107  | 0.001   |
| <b>Age</b>                                     | 0.0003      | 0.0002  | 0.11    |
| <b>Female</b>                                  | 0.1549      | 0.005   | 0       |
| <b>Elixhauser Comorbidity Index</b>            | 0.0023      | 0.0025  | 0.352   |
| <b>Hospital Type</b>                           |             |         |         |
| Private, <100 beds (Reference)                 | Ref         | Ref     | Ref     |
| Private, >100 beds compared to reference       | 0.474       | 0.0754  | 0       |
| NFP, Rural, <100 compared to reference         | 0.2939      | 0.0742  | 0       |
| NFP, Rural, >100 beds compared to reference    | 0.2376      | 0.0731  | 0.001   |
| NFP, Urban, <100 beds compared to reference    | 0.266       | 0.0735  | 0       |
| NFP, Urban, 100-299 beds compared to reference | 0.3085      | 0.0726  | 0       |
| NFP, Urban, >300 beds compared to reference    | 0.3252      | 0.0726  | 0       |
| <b>Admission Type</b>                          |             |         |         |
| Emergent (Reference)                           | Ref         | Ref     | Ref     |
| Urgent compared to reference                   | 0.0246      | 0.0087  | 0.005   |
| Elective compared to reference                 | -0.0325     | 0.0132  | 0.014   |
| <b>Complicated Disease</b>                     | -0.2797     | 0.0105  | 0       |
| <b>Temporal trend (2001 Q1 -- 2009 Q4)</b>     | 0.0094      | 0.0005  | 0       |

**eTable 3.** Difference-in-differences regression output with corresponding sensitivity analyses for Massachusetts (non-white vs white patients)

| Probability of MIS                             | Coefficient | Std Err | P-Value |
|------------------------------------------------|-------------|---------|---------|
| <b>Non-White*Intervention</b>                  | 0.0463      | 0.181   | 0.011   |
| <b>Non-White</b>                               | -0.507      | 0.0124  | 0       |
| <b>Intervention</b>                            | 0.0154      | 0.0201  | 0.442   |
| <b>Age</b>                                     | 0.0002      | 0.0004  | 0.629   |
| <b>Female</b>                                  | 0.1354      | 0.009   | 0       |
| <b>Elixhauser Comorbidity Index</b>            | 0.0072      | 0.0046  | 0.122   |
| <b>Hospital Type</b>                           |             |         |         |
| Private, <100 beds (Reference)                 | Ref         | Ref     | Ref     |
| Private, >100 beds compared to reference       | 0.4876      | 0.0699  | 0       |
| NFP, Rural, <100 compared to reference         | 0.0254      | 0.081   | 0.754   |
| NFP, Rural, >100 beds compared to reference    | 0.2589      | 0.0754  | 0.001   |
| NFP, Urban, <100 beds compared to reference    | 0.2431      | 0.0691  | 0       |
| NFP, Urban, 100-299 beds compared to reference | 0.2939      | 0.0673  | 0       |
| NFP, Urban, >300 beds compared to reference    | 0.2846      | 0.0673  | 0       |
| <b>Admission Type</b>                          |             |         |         |
| Emergent (Reference)                           | Ref         | Ref     | Ref     |
| Urgent compared to reference                   | 0.0005      | 0.0109  | 0.961   |
| Elective compared to reference                 | -0.0593     | 0.0318  | 0.062   |
| <b>Complicated Disease</b>                     | -0.3111     | 0.02    | 0       |
| <b>Temporal trend (2001 Q1 -- 2009 Q4)</b>     | 0.01        | 0.0009  | 0       |

**eTable 4.** Difference-in-differences regression output with corresponding sensitivity analyses for control states (non-white vs white patients)

| Probability of MIS                             | Coefficient | Std Err | P-Value |
|------------------------------------------------|-------------|---------|---------|
| <b>Non-White*Intervention</b>                  | -0.0051     | 0.0071  | 0.478   |
| <b>Non-White</b>                               | -0.0207     | 0.0049  | 0       |
| <b>Intervention</b>                            | 0.0305      | 0.0085  | 0       |
| <b>Age</b>                                     | 0.0005      | 0.0002  | 0.002   |
| <b>Female</b>                                  | 0.1933      | 0.0035  | 0       |
| <b>Elixhauser Comorbidity Index</b>            | 0.002       | 0.0018  | 0.28    |
| <b>Hospital Type</b>                           |             |         |         |
| Private, <100 beds (Reference)                 | Ref         | Ref     | Ref     |
| Private, >100 beds compared to reference       | 0.5172      | 0.1743  | 0.003   |
| NFP, Rural, <100 compared to reference         | 0.4412      | 0.1739  | 0.011   |
| NFP, Rural, >100 beds compared to reference    | 0.3567      | 0.1734  | 0.04    |
| NFP, Urban, <100 beds compared to reference    | 0.4544      | 0.1737  | 0.009   |
| NFP, Urban, 100-299 beds compared to reference | 0.4347      | 0.1732  | 0.012   |
| NFP, Urban, >300 beds compared to reference    | 0.4494      | 0.1732  | 0.009   |
| <b>Admission Type</b>                          |             |         |         |
| Emergent (Reference)                           | Ref         | Ref     | Ref     |
| Urgent compared to reference                   | 0.0155      | 0.0084  | 0.064   |
| Elective compared to reference                 | 0.0063      | 0.0096  | 0.508   |
| <b>Complicated Disease</b>                     | -0.247      | 0.0076  | 0       |
| <b>Temporal trend (2001 Q1 -- 2009 Q4)</b>     | 0.0096      | 0.0003  | 0       |
